# Supplementary figures and images for: Assessing mandatory stay‐at‐home and business closure effects on the spread of COVID‐19
Source: PubMed Central journal article supplement — Eur J Clin Invest. 2021 Feb 1;51(4):e13484. doi: 10.1111/eci.13484 (PMC7883103; doi:10.1111/eci.13484), 2021-02-01

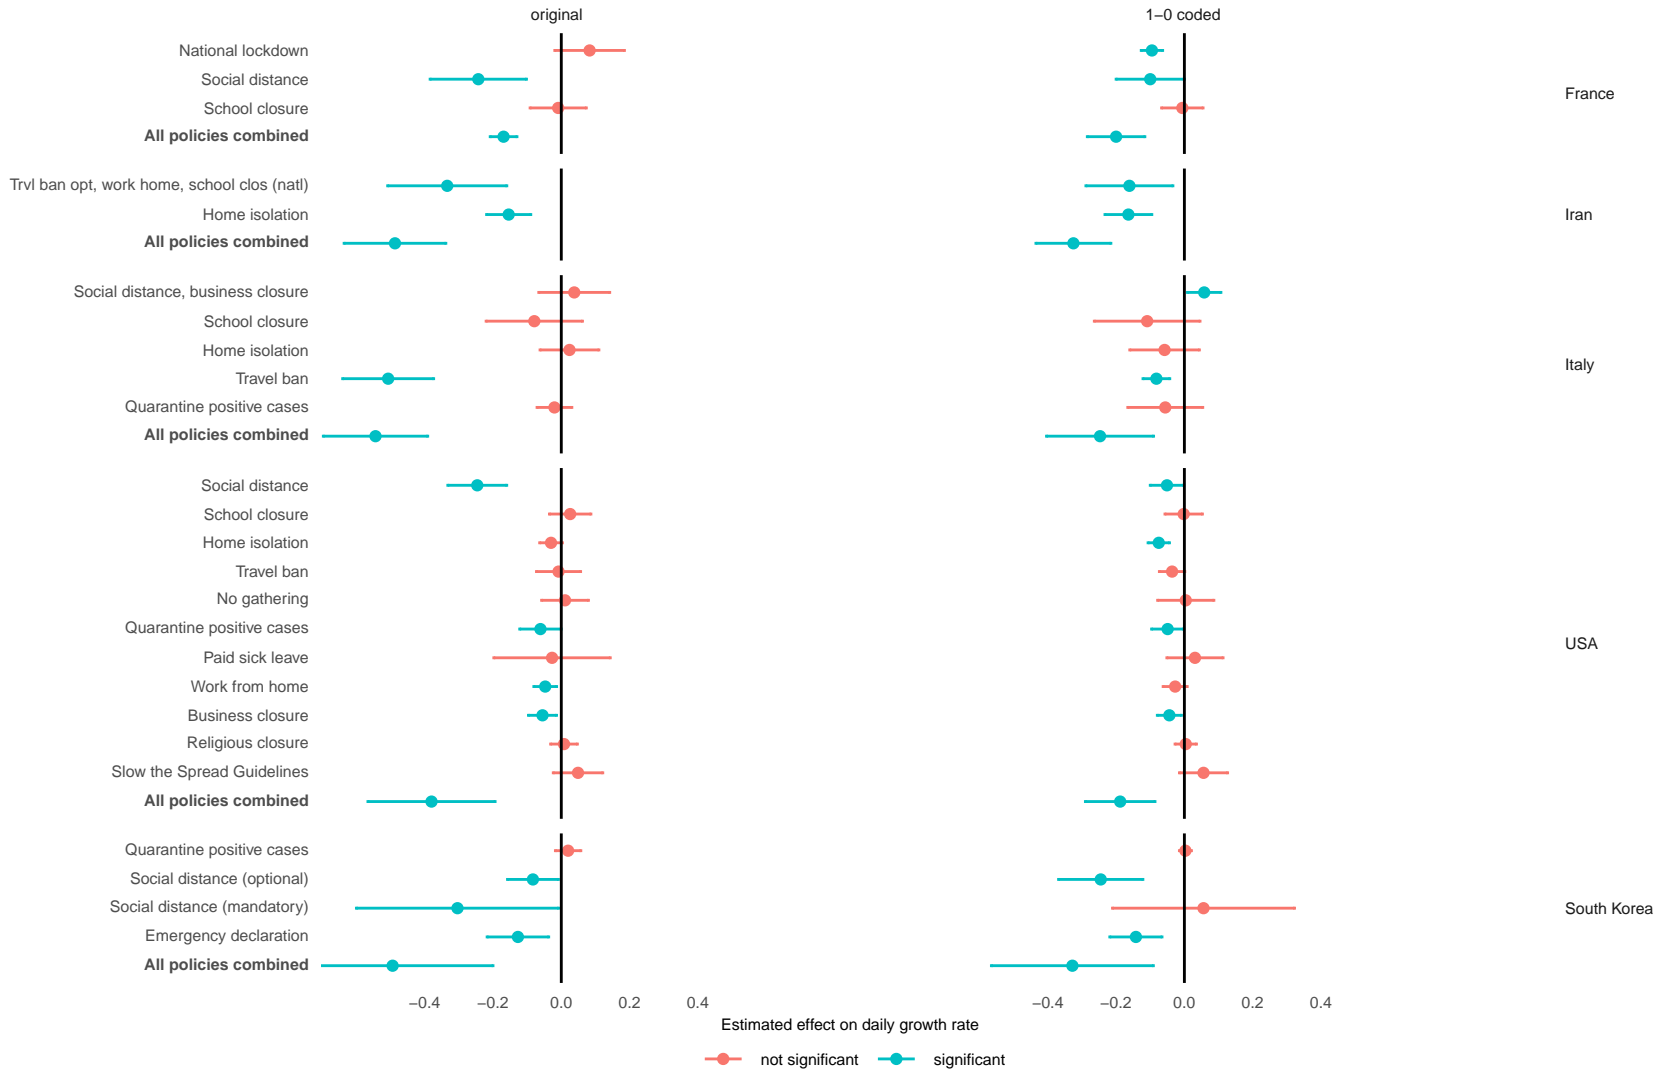

Supplement: ECI-51-0-s001.pdf [file ECI-51-0-s001.pdf]
